# Supplementary material for: Predictive assembling model reveals the self-adaptive elastic properties of lamellipodial actin networks for cell migration
Source: PubMed Central journal article supplement (PMC7588425; doi:10.1038/s42003-020-01335-z), 2020-10-26
Supplement: 42003_2020_1335_MOESM1_ESM.pdf [file 42003_2020_1335_MOESM1_ESM.pdf]

**Supplementary Information for**

**Predictive assembling model reveals the self-adaptive elastic properties of lamellipodial actin network for cell migration**

Xindong Chen<sup>1</sup>, Hanxing Zhu<sup>1\*</sup>, XiQiao Feng<sup>2</sup>, Xiaona Li<sup>3</sup>, Yongtao Lu<sup>4</sup>, Zuobin Wang<sup>5</sup>,  
Yacine Rezgui<sup>1</sup>

<sup>1</sup> School of Engineering, Cardiff University, Cardiff CF24 3AA, UK

<sup>2</sup> Institute of Biomechanics and Medical Engineering, AML, Department of Engineering Mechanics, Tsinghua University, Beijing 100084, China

<sup>3</sup> School of Computer Science, Northwestern Polytechnical University, Xi'an 710129, China

<sup>4</sup> State Key Laboratory of Structural Analysis for Industrial Equipment, Dalian University of Technology, Dalian, China

<sup>5</sup> International Research Centre for Nano Handling and Manufacturing of China, Changchun University of Science and Technology, Changchun 130022, China

**This PDF file includes:**

Supplementary information text

Supplementary Tables 1 to 5

SI References

## Supplementary Information Text

### Supplementary Information of Intracellular Proteins

**Filament density (F-actin concentration).** According to electron microscopy investigation, the concentration of F-actin in lamellipodia is normally in the range of 0.5 mM to 2 mM<sup>1,2</sup> and can reach up to 10 mM in some local areas<sup>3,4</sup>. Using Eq. (S1) in the main text, the total length of actin filaments can be calculated, which agrees well with the experimental measurements, i.e., 180~500  $\mu\text{m}$  total length of filaments per  $\mu\text{m}^2$  in the lamellipodia<sup>5</sup>. Based on the dimensions of actin filaments and lamellipodia, the actin filament density of the branched actin filament networks in lamellipodia can be obtained in the range of 3%~10%. In the RVE model, the density (or solid volume fraction) of actin filaments can be derived as

$$V_f = \frac{\sum_{i=1}^{N^{\text{filament}}} r_i \pi d^2}{4w^2h} \quad (\text{S1})$$

where  $N^{\text{filament}}$  is the total number of actin filaments in the RVE model;  $r_i$  is the length of the  $i$ th actin filament;  $d$  is the diameter of actin filaments;  $w$  and  $h$  are the side length and thickness of the RVE model (Main text, Fig. 2d), respectively.

**Number of successive branching generations formed by Arp2/3 complex.** We have studied the effect of the number  $K$  of successive branching generations from a mother filament and explored its possible value on the basis of the protrusion force generated per filament. In order to exclude the impact of Arp2/3 complex density, the average interval  $d_{arp}$  along actin filaments for forming one Arp2/3 complex is fixed by using the same

uniform distribution (  $U(50,150)$  ) in all models. Here we take the lamellipodia of keratocytes as example in our main text, whose density of actin filaments in the branched actin network is about 7.8%. When a cell moves or spreads, using the polymerization force generated by actin filaments and the Young's modulus  $E_2$  of the branched actin network obtained from our finite element simulations, the compressive stress  $\sigma$  and strain  $\varepsilon$  of the branched actin network in the migration direction (i.e. the y direction) can be obtained as

$$\sigma = \frac{nf_p}{wh} \quad (\text{S2})$$

$$\varepsilon = \frac{\sigma}{E_2} \quad (\text{S3})$$

where  $n$  is the total number of actin filaments that push against the leading edge membrane of lamellipodium;  $f_p$  is the average polymerization force (in the cell movement direction) generated by an actin filament.

**Density of Arp2/3 complex.** Experiments showed that the concentration of Arp 2/3 complex plays an essential role in cell motility by affecting the branching density in the branched actin network <sup>6, 7</sup>. We examined the effects of branching density on the elastic properties of branched actin network while the subnetworks were kept having 3 successive branching generations. Because the branching points formed by Arp2/3 complex are relatively rigid, the average value of  $d_{arp}$ , which is defined as the average distance of two adjacent Arp2/3 complex along a filament, is also called the characteristic length  $l_c$  in the branched actin filament <sup>8</sup>. The average density of Arp 2/3 complex is defined as  $n_{arp}$ , which

is the average number of Arp 2/3 complex along the average length of actin filaments  $r_a$ .

Parameter  $n_{arp}$  can be obtained from the following equation

$$N_m(n_{arp}^3 + n_{arp}^2 + n_{arp}) = N_{arp} \quad (\text{S4})$$

where  $N_m$  and  $N_{arp}$  are the total number of the mother filaments and the total number of Arp 2/3 complex in the model, respectively.

To quantify the network heterogeneity, the RVE model is equally divided into  $\kappa$  parts in the  $xy$  plane and the density of actin filaments in each part is calculated. Then, the network heterogeneity  $\Omega$  can be defined as

$$\Omega = \frac{1}{V_f} \sqrt{\frac{1}{\kappa} \sum_{i=1}^{\kappa} (V_{fi} - V_f)^2} \quad (\text{S5})$$

where  $V_{fi}$  is the filament density of the  $i$ th part.  $V_f$  is the actin filament density of the RVE model and it is also the mean filament density of all the  $\kappa$  parts.

**Densities of flexible crosslinking proteins.** Crosslinking proteins crosslink and stabilize the dendritic subnetworks into an integrated branched actin network<sup>9-15</sup>. Theoretical analysis shows that crosslinking connectivity between fibres is a key parameter influencing the mechanical behavior of fibre networks<sup>16</sup>. Experiments show that mutations and dysfunction of crosslinking proteins significantly impact the mechanical performance of cytoskeleton<sup>17, 18</sup>. The density of crosslinking proteins (including both filamin-A and  $\alpha$ -actinin)  $\rho_a$  is defined as the average number of them along the average length of a filament, and given by

$$\rho_c = r_a N_c / L \quad (\text{S6})$$

where  $N_c$  is the total number of filamin-A and  $\alpha$ -actinin,  $r_a$  is the average length of actin filaments and  $L$  is the total length of actin filaments in the RVE model (Main text, Fig. 1g). The individual density of filamin-A  $\rho_f$  or  $\alpha$ -actinin  $\rho_a$  can also be obtained by using Eq. (S6) by replacing  $N_c$  by the total number of filamin-A or  $\alpha$ -actinin, respectively. To quantitatively assess the impact of crosslinking density on the elastic properties of the branched actin network, we develop the models by giving different possibilities  $p_c$  of 1.0, 0.9, 0.8, 0.7, 0.6, 0.5, 0.4 and 0.3 for generating a cross-linker between the two possible points of two filaments to simulate the assembling or disassembling of crosslinking proteins during cell migration.

**Supplementary Figure 1** Schematic operation of generating actin filaments, Arp2/3 complex and crosslinking proteins (filamin-A and  $\alpha$ -actinin) on the boundaries of an in-plane periodic RVE model.

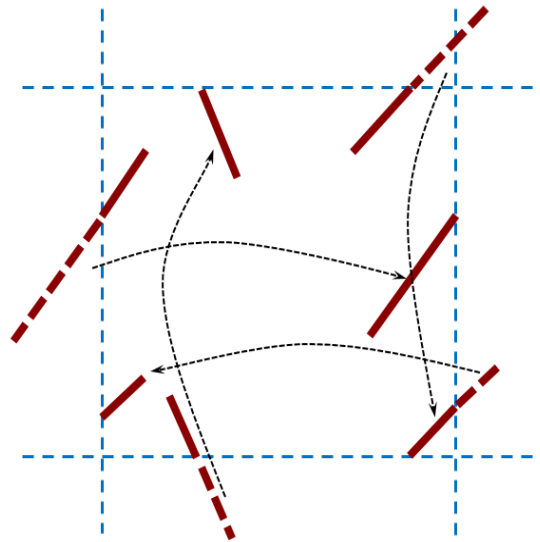

**Supplementary Figure 2** The dimensionless Young's and shear moduli of the branched actin network when the Young's modulus of actin filaments is  $10E_f$  or  $0.1E_f$  and the Young's modulus of crosslinking proteins is  $10E_c$  or  $0.1E_c$ , respectively. The results are normalized by the Young's or shear modulus of the branched actin network when the Young's moduli of actin filaments and crosslinking proteins are  $E_f$  and  $E_c$ .

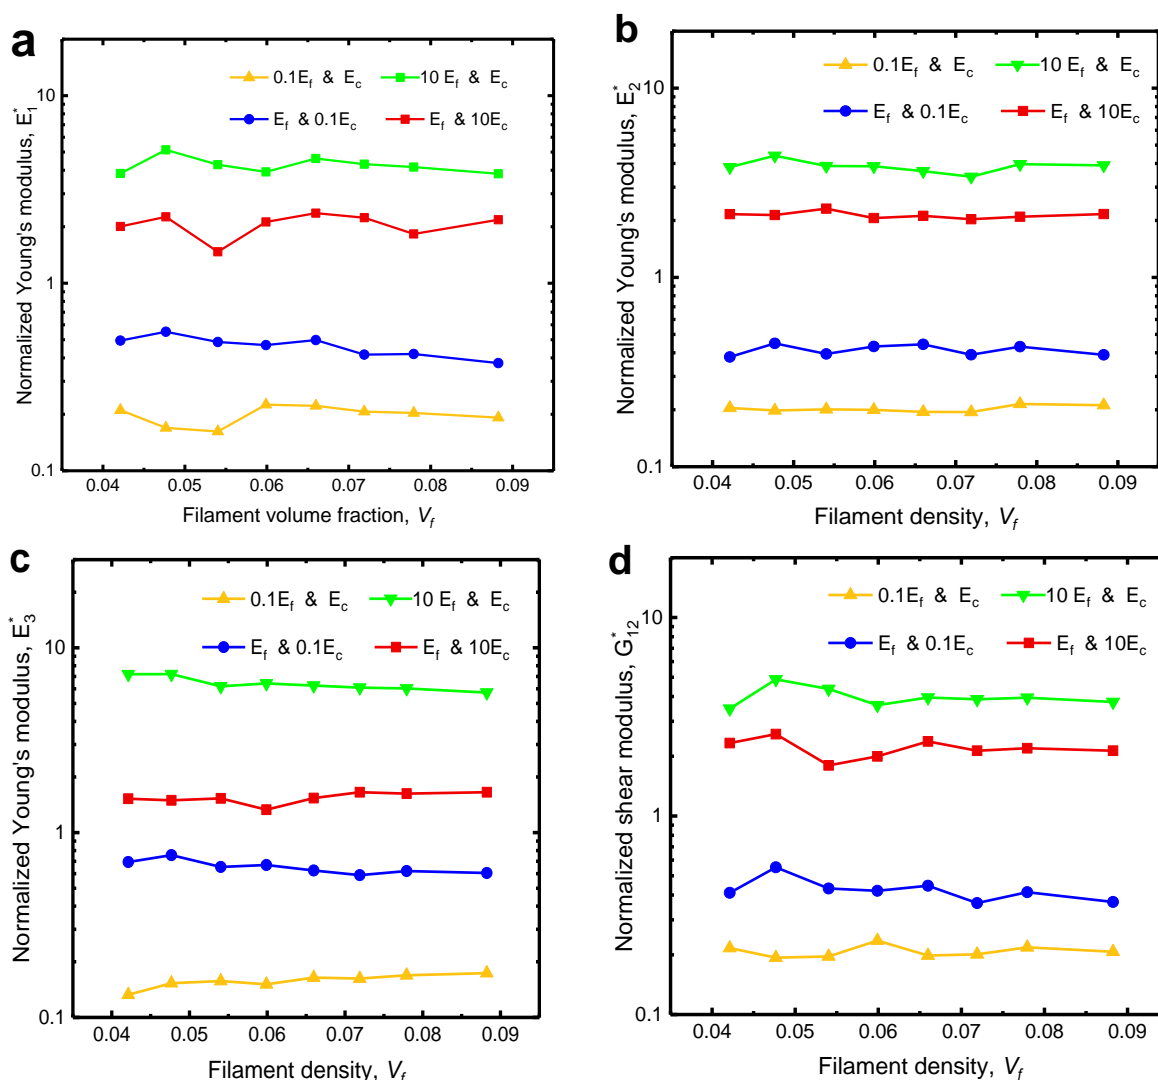

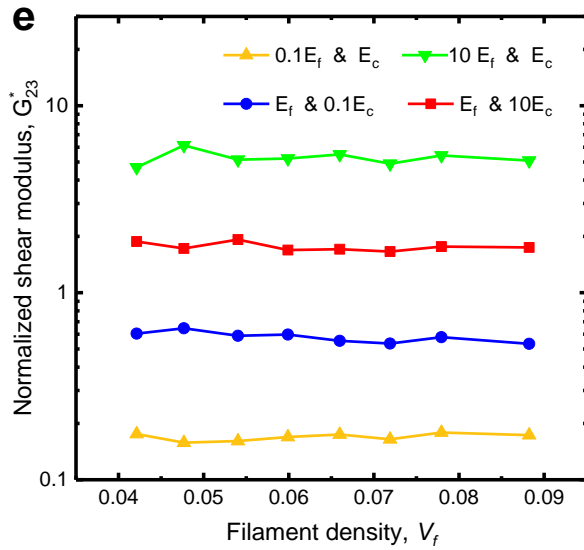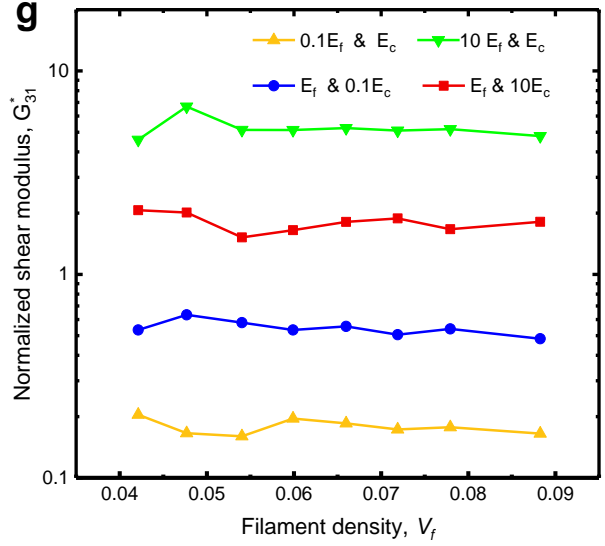

**a** Young's modulus  $E_1^*$ . **b** Young's modulus  $E_2^*$ . **c** Young's modulus  $E_3^*$ . **d** Shear modulus  $G_{12}^*$ . **e** Shear modulus  $G_{23}^*$ . **f** Shear modulus  $G_{31}^*$ .

**Supplementary Figure 3** Statistic results of crosslinking proteins and elastic moduli obtained from more than 2400 stochastic models. Each data point is a mean value calculated from 30 models.

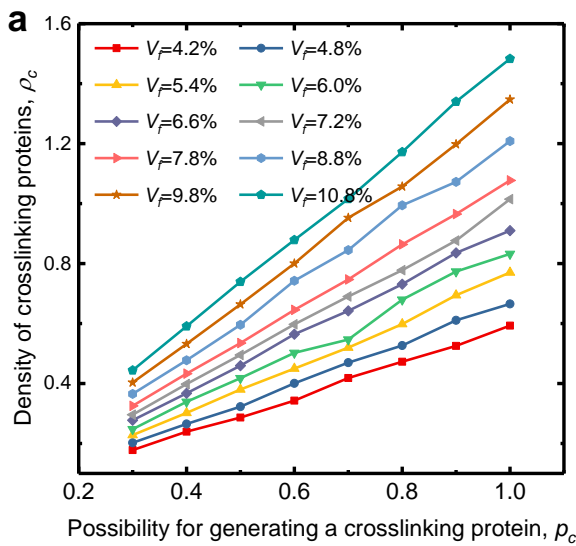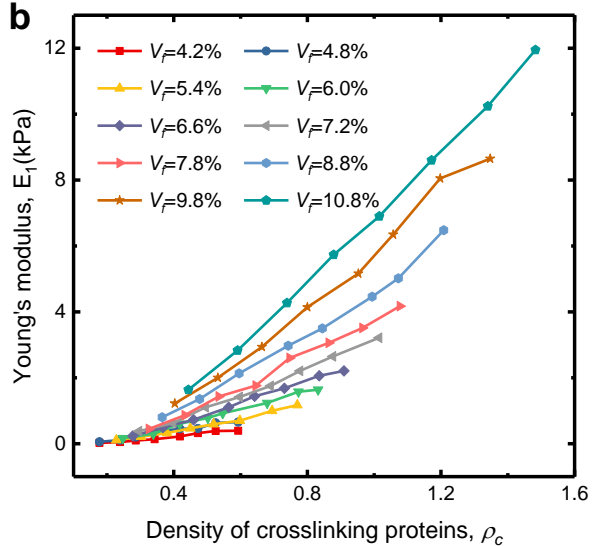

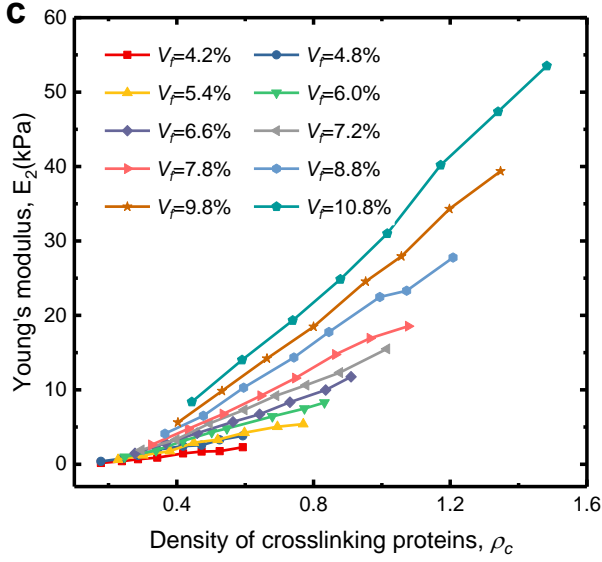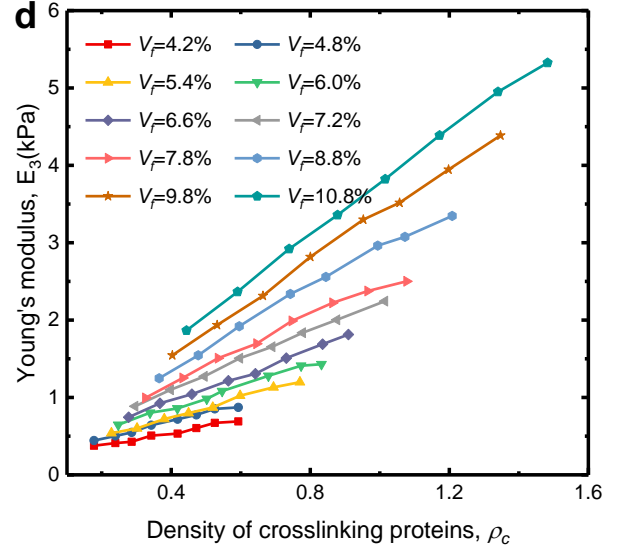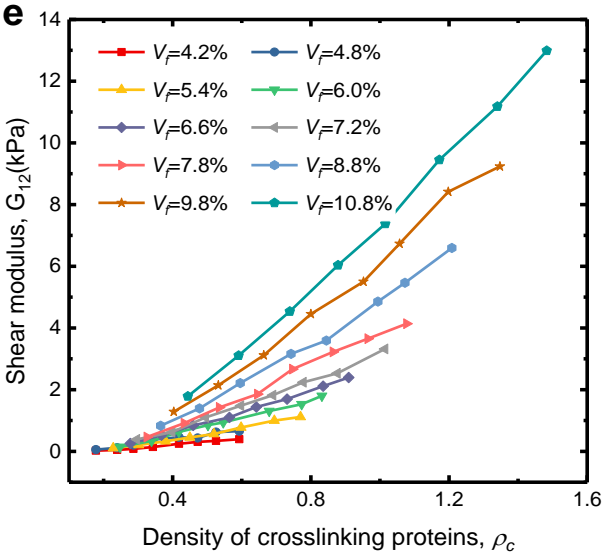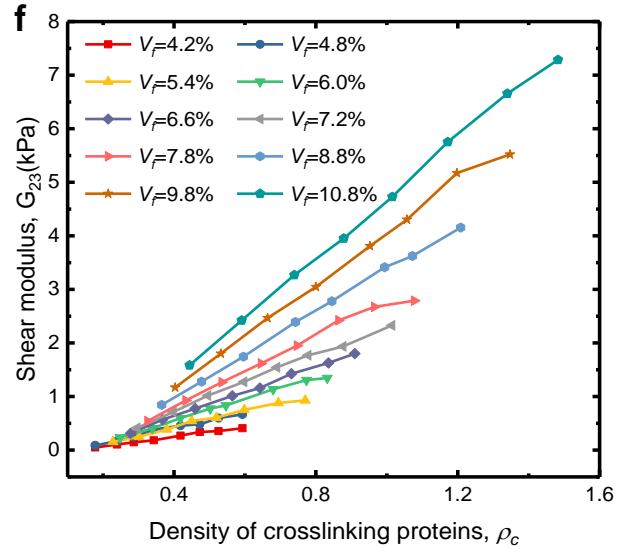



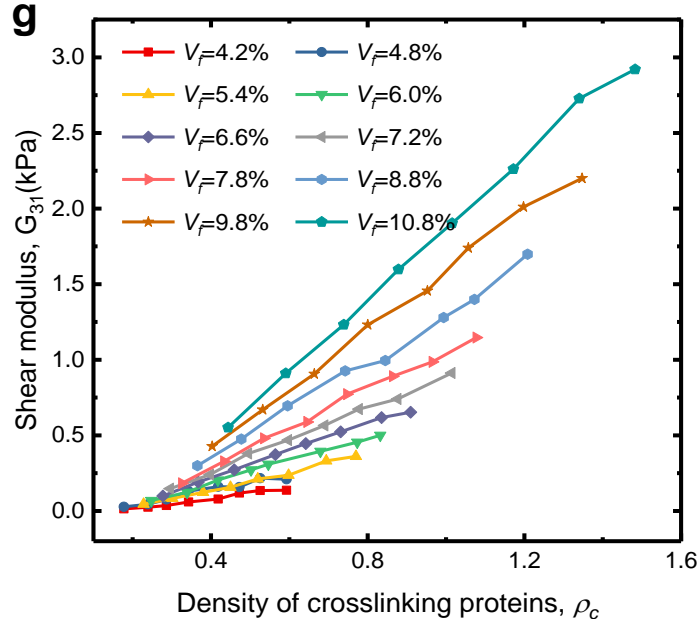

**a** The density of crosslinking proteins (filamin-A and  $\alpha$ -actinin) under different combinations of filament density  $V_f$  and generation possibility  $p_c$ . **b-g** Elastic properties under different combinations of filament density  $V_f$  and the density of crosslinking proteins  $\rho_c$ . **b** Young's modulus  $E_1$ . **c** Young's modulus  $E_2$ . **d** Young's modulus  $E_3$ . **e** Shear modulus  $G_{12}$ . **f** Shear modulus  $G_{23}$ . **g** Shear modulus  $G_{31}$ .

**Supplementary Table 1** Diameters and elastic properties of actin filaments and crosslinking proteins

| Types of proteins                                       | Diameter of cross-section | Poisson's ratio | Young's modulus | Refs. |
|---------------------------------------------------------|---------------------------|-----------------|-----------------|-------|
| Actin filaments                                         | 7 nm                      | 0.3             | 2 Gpa           | 19-21 |
| Crosslinking proteins (filamin-A and $\alpha$ -actinin) | 4 nm                      | 0.3             | 60 Mpa          | 22    |

**Supplementary Table 2** Elastic properties obtained from uniaxial tension, compression and pure shear tests at filament density of 7.8%.

| NO.     | $V_f$     | $E_1$     | $\nu_{21}$ | $\nu_{31}$ | $E_2$     | $\nu_{12}$ | $\nu_{32}$ | $E_3$     | $\nu_{13}$ | $\nu_{23}$ | $G_{12}$  | $G_{23}$  | $G_{31}$  |
|---------|-----------|-----------|------------|------------|-----------|------------|------------|-----------|------------|------------|-----------|-----------|-----------|
| 1       | 0.0778522 | 4.2678778 | 0.0940823  | 0.0107896  | 20.614739 | 0.454437   | 0.1036847  | 3.1668505 | 0.0080062  | 0.0159281  | 3.8039541 | 3.3630058 | 1.2642774 |
| 2       | 0.0792666 | 5.0243766 | 0.0962565  | 0.0193171  | 17.63162  | 0.3377849  | 0.0496505  | 2.8521148 | 0.0109654  | 0.0080315  | 4.2306291 | 2.6399285 | 1.1847965 |
| 3       | 0.0771606 | 3.7419244 | 0.1207253  | 0.0701783  | 13.85511  | 0.4470061  | 0.1775703  | 2.017227  | 0.0378323  | 0.0258532  | 3.4785341 | 2.0618086 | 0.9480159 |
| 4       | 0.0780412 | 5.5472525 | 0.1151662  | 0.0557327  | 16.702145 | 0.3467524  | 0.1003146  | 2.3234713 | 0.0233436  | 0.013955   | 3.9214906 | 2.635923  | 1.3032033 |
| 5       | 0.0768723 | 2.9230772 | 0.0857754  | 0.0765217  | 14.16518  | 0.4156666  | 0.1461422  | 2.0510438 | 0.0536932  | 0.0211606  | 3.2755838 | 2.4807765 | 1.0088077 |
| 6       | 0.0771209 | 3.9816797 | 0.0803671  | 0.0623932  | 17.9945   | 0.3632048  | 0.1969901  | 2.4995533 | 0.0391681  | 0.0273632  | 3.2167591 | 2.7780695 | 1.1669275 |
| 7       | 0.0785634 | 4.2849766 | 0.0796984  | 0.0359364  | 20.172541 | 0.3751989  | 0.2095834  | 2.486744  | 0.0208553  | 0.0258361  | 4.6956616 | 3.1840253 | 1.145986  |
| 8       | 0.0787042 | 4.8105972 | 0.1160545  | 0.0158504  | 25.545948 | 0.61629    | 0.3894709  | 2.4860765 | 0.0081913  | 0.0379025  | 6.1795781 | 3.1765928 | 1.4013368 |
| 9       | 0.0766642 | 3.5332456 | 0.0784434  | -0.0012    | 18.989353 | 0.4215921  | 0.155589   | 2.0047291 | -0.000681  | 0.0164257  | 2.7375534 | 2.5943198 | 0.8740904 |
| 10      | 0.078482  | 4.5412194 | 0.0597446  | 0.0480986  | 15.679609 | 0.2062821  | 0.2550507  | 2.110767  | 0.0223565  | 0.0343398  | 3.2832644 | 2.466487  | 1.0488424 |
| 11      | 0.0782078 | 4.1816981 | 0.0890421  | 0.069263   | 20.511339 | 0.436754   | 0.0533849  | 2.1503483 | 0.035617   | 0.0055967  | 4.8359572 | 3.1812485 | 1.1190167 |
| 12      | 0.0786592 | 4.6561181 | 0.1328038  | 0.0599033  | 23.108978 | 0.6591241  | 0.0605109  | 3.0369098 | 0.0390714  | 0.0079521  | 5.6760994 | 3.255354  | 1.4256858 |
| 13      | 0.0792858 | 4.3561747 | 0.1034888  | 0.0342232  | 23.564185 | 0.5598098  | 0.243775   | 2.7082838 | 0.021277   | 0.0280176  | 5.4312688 | 3.6277938 | 1.3157345 |
| 14      | 0.0765458 | 4.7955925 | 0.1442149  | 0.0586948  | 17.184436 | 0.5167769  | 0.2419162  | 2.682194  | 0.0328283  | 0.0377589  | 4.6900256 | 2.909648  | 1.2631975 |
| 15      | 0.077912  | 4.8739016 | 0.0652526  | 0.05947    | 19.601748 | 0.3955753  | 0.1671987  | 2.463021  | 0.0303461  | 0.0163618  | 4.3468909 | 2.6012198 | 1.2359605 |
| 16      | 0.0779638 | 3.9286531 | 0.1066913  | 0.0424206  | 19.304405 | 0.4785685  | 0.1863177  | 2.592608  | 0.0265858  | 0.023443   | 3.9924441 | 3.0921485 | 1.150878  |
| 17      | 0.0788466 | 3.8822397 | 0.1166994  | 0.0256228  | 16.775916 | 0.4644003  | 0.1779509  | 2.4915293 | 0.0177641  | 0.0212088  | 4.0073034 | 2.6035683 | 1.007417  |
| 18      | 0.0780435 | 4.0378125 | 0.1228836  | 0.0368926  | 18.167973 | 0.5529096  | 0.2442945  | 1.9488515 | 0.0178062  | 0.0262051  | 4.3874763 | 2.3978463 | 1.0167932 |
| 19      | 0.0770202 | 4.2241363 | 0.119251   | 0.0049068  | 14.608055 | 0.4123979  | 0.1730022  | 2.3752303 | 0.0027591  | 0.0281297  | 3.669225  | 2.3978763 | 0.9771235 |
| 20      | 0.0770612 | 3.5938134 | 0.112496   | 0.0279667  | 18.707518 | 0.5855956  | 0.1996629  | 3.005836  | 0.0233912  | 0.0320809  | 4.0125828 | 2.9531295 | 1.1459111 |
| 21      | 0.0765107 | 4.0981138 | 0.1194188  | 0.0802675  | 20.492428 | 0.5971482  | 0.3156111  | 2.3124925 | 0.0452935  | 0.0356155  | 4.5749059 | 3.1770935 | 1.2366593 |
| 22      | 0.0797588 | 5.642365  | 0.175075   | 0.0789544  | 17.821861 | 0.5529885  | 0.1794574  | 2.6204168 | 0.0366679  | 0.0263863  | 4.5555672 | 2.777565  | 1.3265745 |
| 23      | 0.0774463 | 2.2097366 | 0.0864393  | 0.0313045  | 14.563214 | 0.5696757  | 0.1882368  | 2.1272375 | 0.0301357  | 0.0274956  | 2.7335994 | 2.5983623 | 0.6794959 |
| 24      | 0.0778448 | 4.6102844 | 0.14059    | 0.0325993  | 18.238496 | 0.5561805  | 0.1260762  | 2.648472  | 0.0187273  | 0.0183079  | 5.5051769 | 2.4909135 | 1.1921749 |
| 25      | 0.0771923 | 4.4607059 | 0.09891    | 0.0170179  | 17.60364  | 0.3903363  | 0.1160297  | 2.6349368 | 0.0100525  | 0.0173675  | 3.9358297 | 2.5376955 | 1.1978278 |
| 26      | 0.0768698 | 3.43743   | 0.0668624  | -0.034843  | 18.568499 | 0.3611813  | 0.0935916  | 2.9745265 | -0.030151  | 0.0149926  | 3.4933303 | 2.8012683 | 1.1250177 |
| 27      | 0.0786199 | 2.9962525 | 0.0621988  | 0.0132914  | 21.413665 | 0.4445231  | 0.163905   | 2.791442  | 0.0123829  | 0.0213663  | 3.2703084 | 2.7799155 | 0.8966991 |
| 28      | 0.0778698 | 4.0795019 | 0.1364903  | 0.0122197  | 16.09174  | 0.5383911  | 0.1762109  | 2.1576678 | 0.006463   | 0.0236273  | 4.0499259 | 2.2417545 | 1.0299721 |
| 29      | 0.0795129 | 4.3093334 | 0.0811484  | 0.0632936  | 22.014955 | 0.4145603  | 0.1662105  | 2.563016  | 0.0376445  | 0.0193505  | 4.0896959 | 3.02968   | 1.1907323 |
| 30      | 0.0790069 | 4.2832084 | 0.1043167  | 0.0556636  | 16.77212  | 0.4084816  | 0.260241   | 2.7940193 | 0.0363108  | 0.0433527  | 4.0249734 | 2.7485953 | 1.4839206 |
| Average | 0.0779635 | 4.17711   | 0.1036862  | 0.0387584  | 18.548864 | 0.4626531  | 0.1772543  | 2.5025872 | 0.0224901  | 0.0233804  | 4.1368532 | 2.7861204 | 1.1454359 |
| Std.    | 0.0009176 | 0.7135686 | 0.0267501  | 0.0270037  | 2.7861428 | 0.0992592  | 0.0739765  | 0.3291576 | 0.0164743  | 0.0090594  | 0.8167818 | 0.3525769 | 0.1728945 |

**Supplementary Table 3** Relationships between the elastic constants of the branched actin filament network with a filament density of 7.8%.

| NO.     | $V_f$     | $v_{21}/E_1$ | $v_{12}/E_2$ | $v_{31}/E_1$ | $v_{13}/E_3$ | $v_{32}/E_2$ | $v_{23}/E_3$ |
|---------|-----------|--------------|--------------|--------------|--------------|--------------|--------------|
| 1       | 0.0778522 | 0.0220443    | 0.0220443    | 0.0025281    | 0.0025281    | 0.0050296    | 0.0050296    |
| 2       | 0.0792666 | 0.0191579    | 0.0191579    | 0.0038447    | 0.0038447    | 0.002816     | 0.002816     |
| 3       | 0.0771606 | 0.0322629    | 0.0322629    | 0.0187546    | 0.0187546    | 0.0128162    | 0.0128162    |
| 4       | 0.0780412 | 0.020761     | 0.020761     | 0.0100469    | 0.0100469    | 0.0060061    | 0.0060061    |
| 5       | 0.0768723 | 0.0293442    | 0.0293443    | 0.0261785    | 0.0261785    | 0.010317     | 0.010317     |
| 6       | 0.0771209 | 0.0201842    | 0.0201842    | 0.0156701    | 0.0156701    | 0.0109472    | 0.0109472    |
| 7       | 0.0785634 | 0.0185995    | 0.0185995    | 0.0083866    | 0.0083866    | 0.0103895    | 0.0103895    |
| 8       | 0.0787042 | 0.0241248    | 0.0241248    | 0.0032949    | 0.0032949    | 0.0152459    | 0.0152459    |
| 9       | 0.0766642 | 0.0222015    | 0.0222015    | -0.00034     | -0.00034     | 0.0081935    | 0.0081935    |
| 10      | 0.078482  | 0.0131561    | 0.0131561    | 0.0105916    | 0.0105916    | 0.0162664    | 0.0162689    |
| 11      | 0.0782078 | 0.0212933    | 0.0212933    | 0.0165634    | 0.0165634    | 0.0026027    | 0.0026027    |
| 12      | 0.0786592 | 0.0285224    | 0.0285224    | 0.0128655    | 0.0128655    | 0.0026185    | 0.0026185    |
| 13      | 0.0792858 | 0.0237568    | 0.0237568    | 0.0078563    | 0.0078563    | 0.0103451    | 0.0103451    |
| 14      | 0.0765458 | 0.0300724    | 0.0300724    | 0.0122393    | 0.0122393    | 0.0140776    | 0.0140776    |
| 15      | 0.077912  | 0.0091016    | 0.0091016    | 0.0153514    | 0.0153514    | 0.0063838    | 0.0063838    |
| 16      | 0.0779638 | 0.0271572    | 0.0271572    | 0.0107977    | 0.0107977    | 0.0082761    | 0.0082761    |
| 17      | 0.0788466 | 0.0300598    | 0.0300598    | 0.0066013    | 0.0066012    | 0.0078798    | 0.0078798    |
| 18      | 0.0780435 | 0.0304332    | 0.0304332    | 0.0091368    | 0.0091368    | 0.0134464    | 0.0134464    |
| 19      | 0.0770202 | 0.0282309    | 0.0282309    | 0.0011616    | 0.0011616    | 0.0118429    | 0.0118429    |
| 20      | 0.0770612 | 0.0313027    | 0.0313027    | 0.0077819    | 0.0077819    | 0.0106729    | 0.0106729    |
| 21      | 0.0765107 | 0.0291399    | 0.0291399    | 0.0195865    | 0.0195865    | 0.0154014    | 0.0154014    |
| 22      | 0.0797588 | 0.0310287    | 0.0310287    | 0.0139931    | 0.0139931    | 0.0100695    | 0.0100695    |
| 23      | 0.0774463 | 0.0391174    | 0.0391174    | 0.0141666    | 0.0141666    | 0.0129255    | 0.0129255    |
| 24      | 0.0778448 | 0.0304949    | 0.0304949    | 0.007071     | 0.007071     | 0.0069126    | 0.0069126    |
| 25      | 0.0771923 | 0.0221736    | 0.0221736    | 0.0038151    | 0.0038151    | 0.0065912    | 0.0065912    |
| 26      | 0.0768698 | 0.0194513    | 0.0194513    | -0.010136    | -0.010136    | 0.0050403    | 0.0050403    |
| 27      | 0.0786199 | 0.0207589    | 0.0207589    | 0.004436     | 0.004436     | 0.0076542    | 0.0076542    |
| 28      | 0.0778698 | 0.0334576    | 0.0334576    | 0.0029954    | 0.0029954    | 0.0109504    | 0.0109504    |
| 29      | 0.0795129 | 0.0188308    | 0.0188308    | 0.0146876    | 0.0146876    | 0.0075499    | 0.0075499    |
| 30      | 0.0790069 | 0.0243548    | 0.0243548    | 0.0129958    | 0.0129959    | 0.0155163    | 0.0155163    |
| Average | 0.0779635 | 0.0250191    | 0.0250191    | 0.0094307    | 0.0094307    | 0.0094928    | 0.0094929    |

**Supplementary Table 4** When filament density is 7.8%, the statistic numbers of Arp2/3 complex, filamin-A,  $\alpha$ -actinin, crosslinking proteins (filamin-A +  $\alpha$ -actinin) and actin filaments at the cross-section of  $y=1000$ , and the average length of actin filaments,  $r_a$ , in the RVE model.

| NO.     | $V_f$     | Arp2/3    | Filamin-A | $\alpha$ -actinin | Crosslinking proteins | Average length of filament, $r_a$ | Number of actin filaments at $y=1000$ |
|---------|-----------|-----------|-----------|-------------------|-----------------------|-----------------------------------|---------------------------------------|
| 1       | 0.0778522 | 1559      | 1164      | 771               | 1935                  | 0.2485194                         | 319                                   |
| 2       | 0.0792666 | 1578      | 1076      | 670               | 1746                  | 0.2496607                         | 272                                   |
| 3       | 0.0771606 | 1526      | 941       | 560               | 1501                  | 0.2509361                         | 303                                   |
| 4       | 0.0780412 | 1553      | 1120      | 630               | 1750                  | 0.2501986                         | 277                                   |
| 5       | 0.0768723 | 1532      | 1146      | 669               | 1815                  | 0.2498419                         | 289                                   |
| 6       | 0.0771209 | 1541      | 1150      | 662               | 1812                  | 0.2501807                         | 328                                   |
| 7       | 0.0785634 | 1565      | 1157      | 662               | 1819                  | 0.2492589                         | 284                                   |
| 8       | 0.0787042 | 1563      | 1043      | 679               | 1722                  | 0.2506234                         | 284                                   |
| 9       | 0.0766642 | 1514      | 999       | 591               | 1590                  | 0.2520023                         | 291                                   |
| 10      | 0.078482  | 1562      | 1022      | 635               | 1657                  | 0.2496101                         | 329                                   |
| 11      | 0.0782078 | 1562      | 1056      | 682               | 1738                  | 0.2491956                         | 271                                   |
| 12      | 0.0786592 | 1551      | 1349      | 712               | 2061                  | 0.2510958                         | 337                                   |
| 13      | 0.0792858 | 1577      | 1192      | 729               | 1921                  | 0.250328                          | 294                                   |
| 14      | 0.0765458 | 1538      | 1121      | 628               | 1749                  | 0.2476965                         | 285                                   |
| 15      | 0.077912  | 1552      | 981       | 688               | 1669                  | 0.2518485                         | 270                                   |
| 16      | 0.0779638 | 1558      | 1123      | 662               | 1785                  | 0.2513505                         | 297                                   |
| 17      | 0.0788466 | 1544      | 1062      | 677               | 1739                  | 0.2512433                         | 278                                   |
| 18      | 0.0780435 | 1527      | 1004      | 682               | 1686                  | 0.2533318                         | 289                                   |
| 19      | 0.0770202 | 1529      | 904       | 669               | 1573                  | 0.2493868                         | 244                                   |
| 20      | 0.0770612 | 1545      | 1030      | 670               | 1700                  | 0.248436                          | 290                                   |
| 21      | 0.0765107 | 1512      | 1077      | 671               | 1748                  | 0.2511801                         | 299                                   |
| 22      | 0.0797588 | 1584      | 1015      | 717               | 1732                  | 0.2501497                         | 255                                   |
| 23      | 0.0774463 | 1522      | 936       | 576               | 1512                  | 0.2518649                         | 290                                   |
| 24      | 0.0778448 | 1551      | 1110      | 655               | 1765                  | 0.249415                          | 325                                   |
| 25      | 0.0771923 | 1541      | 987       | 647               | 1634                  | 0.2474771                         | 322                                   |
| 26      | 0.0768698 | 1528      | 1157      | 610               | 1767                  | 0.2495217                         | 283                                   |
| 27      | 0.0786199 | 1584      | 1168      | 639               | 1807                  | 0.2477742                         | 259                                   |
| 28      | 0.0778698 | 1538      | 1019      | 700               | 1719                  | 0.2510429                         | 243                                   |
| 29      | 0.0795129 | 1586      | 1112      | 723               | 1835                  | 0.2495293                         | 319                                   |
| 30      | 0.0790069 | 1591      | 1181      | 681               | 1862                  | 0.2489937                         | 362                                   |
| Average | 0.0779635 | 1550.4333 | 1080.0667 | 664.9             | 1744.9667             | 0.2500564                         | 292.93333                             |
| Std.    | 0.0009176 | 21.623573 | 92.375658 | 44.242777         | 116.93374             | 0.0013584                         | 27.32756                              |

**Supplementary Table 5** Comparison of Young's modulus  $E_2$  in cell moving direction between our numerical simulation results with  $V_f$  from 3.0% to 9.8% and those from the *in vivo* and *in vitro* experiments.

| Experiment type | Cell type                  | $E_2$ (kPa) | Actin filament density | Method                                       | Ref.               |
|-----------------|----------------------------|-------------|------------------------|----------------------------------------------|--------------------|
| Our prediction  | --                         | 0.6-39      | 3.0% ~ 9.8%            | FEM numerical simulation                     | -                  |
| In vitro        | --                         | 1.0-20      | --                     | Atomic force microscope (AFM)                | ref. <sup>9</sup>  |
| In vitro        | --                         | 0.8-5       | --                     | AFM                                          | ref. <sup>2</sup>  |
| In vitro        | --                         | 1.0-10      | --                     | Magnetic dipolar attraction between colloids | ref. <sup>8</sup>  |
| In vivo         | Adenocarcinoma cells       | 2.0-10      | --                     | AFM                                          | ref. <sup>23</sup> |
| In vivo         | Fish epidermal keratocytes | 21-44       | about 8.0%             | AFM                                          | ref. <sup>24</sup> |
| In vivo         | Motile 3T3 fibroblasts     | 3.0-12      | --                     | AFM                                          | ref. <sup>25</sup> |

## 1 **Supplementary References**

- 2  
3 1. Koestler SA, Rottner K, Lai F, Block J, Vinzenz M, Small JV. F- and G-actin  
4 concentrations in lamellipodia of moving cells. *PLoS One* **4**, e4810 (2009).
- 5 2. Chaudhuri O, Parekh SH, Fletcher DA. Reversible stress softening of actin networks.  
6 *Nature* **445**, 295 (2007).
- 7 3. Akin O, Mullins RD. Capping protein increases the rate of actin-based motility by  
8 promoting filament nucleation by the Arp2/3 complex. *Cell* **133**, 841-851 (2008).
- 9 4. Pollard TD, Blanchoin L, Mullins RD. Molecular mechanisms controlling actin  
10 filament dynamics in nonmuscle cells. *Annu Rev Biophys Biomol Struct* **29**, 545-576  
11 (2000).
- 12 5. Abraham VC, Krishnamurthi V, Taylor DL, Lanni F. The actin-based nanomachine at  
13 the leading edge of migrating cells. *Biophys J* **77**, 1721-1732 (1999).
- 14 6. Maritzen T, Zech T, Schmidt MR, Krause E, Machesky LM, Haucke V. Gadkin  
15 negatively regulates cell spreading and motility via sequestration of the actin-nucleating  
16 ARP2/3 complex. *Proc Natl Acad Sci USA* **109**, 10382-10387 (2012).
- 17 7. Dang I, *et al.* Inhibitory signalling to the Arp2/3 complex steers cell migration. *Nature*  
18 **503**, 281 (2013).
- 19 8. Pujol T, du Roure O, Fermigier M, Heuvingh J. Impact of branching on the elasticity  
20 of actin networks. *Proc Natl Acad Sci USA* **109**, 10364-10369 (2012).

- 21 9. Bieling P, *et al.* Force Feedback Controls Motor Activity and Mechanical Properties of  
22 Self-Assembling Branched Actin Networks. *Cell* **164**, 115-127 (2016).
- 23 10. Blanchoin L, Boujemaa-Paterski R, Sykes C, Plastino J. Actin dynamics, architecture,  
24 and mechanics in cell motility. *Physiol Rev* **94**, 235-263 (2014).
- 25 11. Ridley AJ, *et al.* Cell migration: integrating signals from front to back. *Science* **302**,  
26 1704-1709 (2003).
- 27 12. Svitkina TM, Borisy GG. Arp2/3 complex and actin depolymerizing factor/cofilin in  
28 dendritic organization and treadmilling of actin filament array in lamellipodia. *J Cell*  
29 *Biol* **145**, 1009-1026 (1999).
- 30 13. Medalia O, Weber I, Frangakis AS, Nicastro D, Gerisch G, Baumeister W.  
31 Macromolecular architecture in eukaryotic cells visualized by cryoelectron  
32 tomography. *Science* **298**, 1209-1213 (2002).
- 33 14. Flanagan LA, Chou J, Falet H, Neujahr R, Hartwig JH, Stossel TP. Filamin A, the  
34 Arp2/3 complex, and the morphology and function of cortical actin filaments in human  
35 melanoma cells. *J Cell Biol* **155**, 511-518 (2001).
- 36 15. Cameron LA, Giardini PA, Soo FS, Theriot JA. Secrets of actin-based motility revealed  
37 by a bacterial pathogen. *Nat Rev Mol Cell Biol* **1**, 110 (2000).
- 38 16. Ma Y, Zhu H, Su B, Hu G, Perks R. The elasto-plastic behaviour of three-dimensional  
39 stochastic fibre networks with cross-linkers. *J Mech Phys Solids* **110**, 155-172 (2018).

- 40 17. Ehrlicher AJ, Krishnan R, Guo M, Bidan CM, Weitz DA, Pollak MR. Alpha-actinin  
41 binding kinetics modulate cellular dynamics and force generation. *Proc Natl Acad Sci*  
42 *USA* **112**, 6619-6624 (2015).
- 43 18. Ahmed WW, Betz T. Dynamic cross-links tune the solid–fluid behavior of living cells.  
44 *Proc Natl Acad Sci USA* **112**, 6527-6528 (2015).
- 45 19. Broedersz CP, MacKintosh FC. Modeling semiflexible polymer networks. *Rev Mod*  
46 *Phys* **86**, 995 (2014).
- 47 20. Kojima H, Ishijima A, Yanagida T. Direct measurement of stiffness of single actin  
48 filaments with and without tropomyosin by in vitro nanomanipulation. *Proc Natl Acad*  
49 *Sci USA* **91**, 12962-12966 (1994).
- 50 21. Van Dillen T, Onck P, Van der Giessen E. Models for stiffening in cross-linked  
51 biopolymer networks: A comparative study. *J Mech Phys Solids* **56**, 2240-2264 (2008).
- 52 22. Wei X, Zhu Q, Qian J, Lin Y, Shenoy V. Response of biopolymer networks governed  
53 by the physical properties of cross-linking molecules. *Soft Matter* **12**, 2537-2541  
54 (2016).
- 55 23. Rotsch C, Jacobson K, Condeelis J, Radmacher M. EGF-stimulated lamellipod  
56 extension in adenocarcinoma cells. *Ultramicroscopy* **86**, 97-106 (2001).
- 57 24. Laurent VM, *et al.* Gradient of rigidity in the lamellipodia of migrating cells revealed  
58 by atomic force microscopy. *Biophys J* **89**, 667-675 (2005).



59 25. Rotsch C, Jacobson K, Radmacher M. Dimensional and mechanical dynamics of active  
60 and stable edges in motile fibroblasts investigated by using atomic force microscopy.  
61 *Proc Natl Acad Sci USA* **96**, 921-926 (1999).

62
